# Supplementary material
Source: publisher figshare collection journal article supplement (https://frontiersin.figshare.com/ndownloader/files/26132990)
Supplement: Supplementary file 1 [file 26132990]

**Supplementary Material: Tables**

**Table S1**. Basic information of the spatolara fisheries collected through 15 fishers and owners interviews operating in GSA16.

| **FISHERIES FEATURES** | **Mean** | **Min-Max** |
| --- | --- | --- |
| Crew | 4.3 | 2-5 |
| LFT | 22.6 | 13.9-27.7 |
| GT | 79.7 | 11-120 |
| Kw | 314.9 | 109-470 |
| Fishing days/year (datus) | 129.6 | 100-170 |
| N. of haul/day | 3.7 | 2-5 |
| Haul time (h) | 2 | 1-4 |
| Haul depth (m) | 250.3 | 150-300 |
| **GEAR FEATURES** | **Mean** | **Min-Max** |
| Net material | Nylon/polyethylene | // |
| Length (m) | 80 | 50-100 |
| Vertical opening | 7 | 5-8 |
| Horizontal opening | 6.6 | 6.5-8 |
| CodEnd length (m) | 5.35 | 3-8 |

**Table S2.** Details on the sensitivity analysis summary.

| **Model** | **Prior** | **Prior Lower** | ***B/BMSY*(∆%)** | **Prior**  **(reference model)** | ***B/BMSY*** | **Prior Higher** | ***B/BMSY*(∆%)** |
| --- | --- | --- | --- | --- | --- | --- | --- |
| BSM | *Bstart/k* | 0.01-0.4 | 0.60 (11.11) | 0.2-0.6 | 0.54 | 0.4-0.8 | 0.41 (-24.07) |
| BSM | *Bend/k* | 0.01-0.2 | 0.32 (-40.74) | 0.15-0.4 | 0.54 | 0.2-0.6 | 0.62 (14.81) |
| CMSY | *Bstart/k* | 0.01-0.4 | 0.63 (0.00) | 0.2-0.6 | 0.63 | 0.4-0.8 | 0.62 (-1.59) |
| CMSY | *Bend/k* | 0.01-0.2 | 0.21 (-66.67) | 0.15-0.4 | 0.63 | 0.2-0.6 | 0.79 (25.40) |
| AMSY | *Bstart/k* | 0.4-0.8 | 0.16 (-40.74) | 0.7-1 | 0.27 | // | // |
